# Supplementary material for: Soil water consumption, water use efficiency and winter wheat production in response to nitrogen fertilizer and tillage
Source: PeerJ. 2020 Apr 30;8:e8892. doi: 10.7717/peerj.8892 (PMC7196327; doi:10.7717/peerj.8892)
Supplement: Data S1 [file peerj-08-8892-s001.xlsx]

## Sheet: Sheet1
2014-2015
Tillage method	Nitrogen (kg/ha)	Water storage before sowing				anthesis				Maturity
		repeat 1	repeat 2	average	S.E	repeat 1	repeat 2	average	S.E	repeat 1	repeat 2	average
DT	0	603.23	611.916	607.573	6.14183	432.657	447.049	439.853	10.1768	368.862	375.564	372.213
	90	603.23	611.916	607.573	6.14183	416.831	430.459	423.645	9.63635	347.502	354.24	350.871
	150	603.23	611.916	607.573	6.14183	392.182	405.253	398.718	9.24225	319.762	325.808	322.785
	210	603.23	611.916	607.573	6.14183	375.469	388.972	382.221	9.54795	315.515	321.502	318.508
NT	0	588.56	597.515	593.037	6.33189	423.335	437.35	430.343	9.91038	372.083	379.782	375.933
	90	588.56	597.515	593.037	6.33189	403.229	416.833	410.031	9.61921	354.75	361.98	358.365
	150	588.56	597.515	593.037	6.33189	387.722	387.909	387.815	0.131916	330.53	337.265	333.898
	210	588.56	597.515	593.037	6.33189	364.857	377.619	371.238	9.02429	317.001	323.98	320.491
2015-2016
Tillage method	Nitrogen (kg/ha)	Water storage before sowing				anthesis				Maturity
		repeat 1	repeat 2	average	S.E	repeat 1	repeat 2	average	S.E	repeat 1	repeat 2	average
DT	0	429.22	424.5	426.86	3.33754	298.382	283.182	290.782	10.748	330.032	337.512	333.772
	90	429.22	424.5	426.86	3.33754	281.517	290.917	286.217	6.6468	328.45	331.09	329.77
	150	429.22	424.5	426.86	3.33754	281.758	281.158	281.458	0.424264	330.88	336.32	333.6
	210	429.22	424.5	426.86	3.33754	270.481	280.748	275.615	7.25971	315.19	323.33	319.26
NT	0	400.56	404.28	402.42	2.63044	280.222	278.622	279.422	1.13137	304.59	304.39	304.49
	90	400.56	404.28	402.42	2.63044	275.525	273.925	274.725	1.13137	300.94	303.68	302.31
	150	400.56	404.28	402.42	2.63044	243.609	242.609	243.109	0.707107	291.64	291.14	291.39
	210	400.56	404.28	402.42	2.63044	231.257	259.569	245.413	20.0197	281.59	290.61	286.1
2016-2017
Tillage method	Nitrogen (kg/ha)	Water storage before sowing				anthesis				Maturity
		repeat 1	repeat 2	average	S.E	repeat 1	repeat 2	average	S.E	repeat 1	repeat 2	average
DT	0	421.419	421.501	421.46	0.0586313	340.288	343.248	341.768	2.09304	300.321	304.512	302.417	39.3516
	90	421.419	421.501	421.46	0.0586313	325.595	329.115	327.355	2.48902	293.4	289.09	291.245	36.11
	150	421.419	421.501	421.46	0.0586313	321.47	346.84	334.155	17.9393	283.88	279.32	281.6	52.555
	210	421.419	421.501	421.46	0.0586313	325.469	329.42	327.445	2.79307	288.19	291.33	289.76	37.6845
NT	0	403.593	404.261	403.927	0.472497	325.185	321.964	323.575	2.27688	304.79	308.59	306.69	16.8845
	90	403.593	404.261	403.927	0.472497	309.68	312.62	311.15	2.07889	298.24	294.68	296.46	14.69
	150	403.593	404.261	403.927	0.472497	327.89	322.87	325.38	3.54968	283.64	286.94	285.29	40.09
	210	403.593	404.261	403.927	0.472497	316.755	321.725	319.24	3.51432	303.59	298.61	301.1	18.14

## Sheet: correlation
			Nitrogen (kg/ha)	SWS	SWS															ΔSWS	ΔSWS
year	rep	Tillage method	N	anthesis	Maturity	protein	stem+Sheath	Glume+Spike	Grain	Total N	yield	albumin	globulin	gliadin	glutenin	spikeno	Grainno	gr1000	WUE	s-a	a-m
2014	1	DT	0	432.657	368.862	10.76	13.15	5.71	114.11	136.82	5023.15	1.35	1.13	3.42	3.4	525	31.6976	40.4881	11.4523	304.073	81.3953
2014	1	DT	90	416.831	347.502	11.67	13.32	8.25	134.26	159.9	5110.05	1.54	1.32	3.6	3.71	525	31.724	39.6919	11.0202	319.899	86.9292
2014	1	DT	150	392.182	319.762	13.6	14.27	8.02	145.85	175.48	5308.06	1.85	1.54	4.07	4.31	550	32.516	40.06	13.1605	344.548	90.02
2014	1	DT	210	375.469	315.515	12.26	14.02	6.59	133.51	159.37	5754.69	1.72	1.42	3.91	4.15	567	33.352	40.895	13.6862	361.261	77.5544
2014	1	NT	0	423.335	372.083	11.35	13.01	6.53	105.35	128.26	4578.31	1.58	1.18	3.46	3.54	477	30.888	39.3968	11.4483	298.725	68.8516
2014	1	NT	90	403.229	354.75	11.96	12.27	4.52	125.8	146.93	4943.77	1.6	1.27	3.67	3.81	492	30.8352	38.8613	11.7277	318.831	66.079
2014	1	NT	150	387.722	330.53	13.94	17.12	7.24	130.56	159.18	4883.95	2.05	1.48	4.13	4.42	524	32.34	39.8196	11.5766	334.338	74.792
2014	1	NT	210	364.857	317.001	12.97	11.27	8.12	125.32	148.45	5366.74	1.85	1.33	4.03	4.28	537	32.5688	39.9848	13.8713	357.203	65.4557
2014	2	DT	0	447.049	375.564	10.8	12.83	6.17	124.11	146.44	4923.41	1.37	1.15	3.4	3.42	465	31.0552	40.5521	11.2095	298.367	89.0852
2014	2	DT	90	430.459	354.24	11.69	12	8.85	128.26	152.76	5011.49	1.56	1.36	3.62	3.73	462.5	31.6596	39.6055	10.8102	314.957	93.8195
2014	2	DT	150	405.253	325.808	13.62	14.19	8.52	149.87	180.26	5358.47	1.87	1.52	4.09	4.33	485	32.714	40.0757	12.8601	340.163	97.0447
2014	2	DT	210	388.972	321.502	12.3	13.16	6.73	133.65	159.07	5813.79	1.74	1.44	3.93	4.19	459	33.0834	40.674	13.3891	356.444	85.0704
2014	2	NT	0	437.35	379.782	11.37	11.63	6.73	112.23	133.78	4606.36	1.6	1.2	3.48	3.56	445.5	31.2355	39.8985	11.2171	293.664	75.1679
2014	2	NT	90	416.833	361.98	11.98	13.21	5.1	121.52	144.57	4914.93	1.62	1.31	3.65	3.79	461.5	31.0525	38.864	11.4893	314.182	72.4523
2014	2	NT	150	387.909	337.265	13.98	16.52	7.74	138.36	167.9	4903.68	2.07	1.5	4.17	4.44	456.5	32.1655	39.6112	11.3559	343.106	68.2433
2014	2	NT	210	377.619	323.98	12.99	10.97	8.34	129.4	152.59	5347.43	1.89	1.35	4.09	4.3	454	32.5208	40.6721	13.5797	353.395	71.2395
2014	3	DT	0	439.853	372.213	10.78	12.99	5.94	119.11	141.79	4973.28	1.36	1.14	3.41	3.41	438	31.3764	40.5201	11.3309	301.22	85.2402
2014	3	DT	90	423.645	350.871	11.68	12.66	8.55	131.26	153.76	5060.77	1.55	1.34	3.61	3.72	459	31.6918	39.6487	10.9152	317.428	90.3743
2014	3	DT	150	398.718	322.785	13.61	14.23	8.27	147.86	186.16	5333.26	1.86	1.53	4.08	4.32	483	32.615	40.0679	13.0103	342.355	93.5324
2014	3	DT	210	382.221	318.508	12.28	13.59	6.66	133.58	169.53	5784.24	1.73	1.43	3.92	4.17	455	33.2177	40.7845	13.5376	358.852	81.3124
2014	3	NT	0	430.343	375.933	11.36	12.32	6.63	108.79	136.88	4592.34	1.59	1.19	3.47	3.55	416.5	31.0617	39.6476	11.3327	296.195	72.0098
2014	3	NT	90	410.031	358.365	11.97	12.74	4.81	123.66	141.6	4929.35	1.61	1.29	3.66	3.8	432.5	30.9438	38.8627	11.6085	316.506	69.2657
2014	3	NT	150	387.815	333.898	13.96	16.82	7.49	134.46	166.11	4893.82	2.06	1.49	4.15	4.43	464	32.2528	39.7154	11.4662	338.722	71.5176
2014	3	NT	210	371.238	320.491	12.98	11.12	8.23	127.36	161.21	5357.09	1.87	1.34	4.06	4.29	437.5	32.5448	40.3285	13.7255	355.299	68.3476
2015	1	DT	0	298.382	330.032	11.9	10.887	3.5958	71.8278	89.0836	4381.73	1.64	1.37	3.7	3.71	512	31.47	42.0263	11.3336	300.138	91.1497
2015	1	DT	90	281.517	328.45	12.41	16.0536	6.085	71.5748	97.702	4451.1	1.87	1.61	3.9	4.02	533	31.4	40.7324	11.3975	317.003	75.8674
2015	1	DT	150	281.758	330.88	13.65	20.9846	8.8596	92.933	127.97	5200.95	2.17	1.68	4.26	4.51	556	31.5	43.5122	13.1682	316.762	73.6778
2015	1	DT	210	270.481	315.19	13.25	17.7396	7.4582	80.8398	110.183	4681.01	2.05	1.53	4.12	4.37	554	29.53	41.3004	11.5939	328.039	78.0914
2015	1	NT	0	280.222	304.59	12.37	8.7498	3.3994	63.243	77.6948	3832	1.87	1.42	3.78	3.86	483	27.42	38.3846	10.0224	289.638	98.4318
2015	1	NT	90	275.525	300.94	12.96	12.0246	5.4296	63.284	83.9914	3810.36	1.94	1.63	3.94	4.11	506	25.25	38.4188	10.1778	294.335	97.3852
2015	1	NT	150	243.609	291.64	14.63	16.7776	4.0952	87.9488	112.996	4787.95	2.35	1.85	4.43	4.74	529	31.1	41.4483	11.7194	326.251	74.7693
2015	1	NT	210	231.257	281.59	14.06	10.0446	2.9576	62.8136	78.481	4309.65	2.21	1.72	4.27	4.58	541	30.38	38.8854	10.4204	338.603	72.4669
2015	2	DT	0	283.182	337.512	11.9538	10.193	3.3842	74.0122	90.5964	4487.67	1.68018	1.4188	3.7154	3.69105	450.5	30.93	42.1134	11.6983	310.618	68.4697
2015	2	DT	90	290.917	331.09	12.4751	16.1464	7.235	80.9452	108.038	4504.4	1.83479	1.56911	3.91705	3.97882	465.5	31.67	41.1356	11.6151	302.883	82.6274
2015	2	DT	150	281.158	336.32	13.691	22.7154	8.8804	104.827	142.51	5081.81	2.15447	1.70105	4.30731	4.53622	532.5	32	43.3297	13.52	312.642	67.6378
2015	2	DT	210	280.748	323.33	13.2703	18.5604	7.5218	86.4002	117.577	4736.26	2.00329	1.54932	4.13211	4.38185	477.5	28.59	40.1902	11.973	313.052	80.2181
2015	2	NT	0	278.622	304.39	12.3805	8.5702	4.5206	57.517	73.6052	3946.8	1.91037	1.45583	3.76649	3.83484	442	27.13	38.4431	9.92219	294.958	97.0318
2015	2	NT	90	273.925	303.68	13.0061	11.5154	4.6304	57.896	77.4486	4163.31	1.88092	1.65155	3.97608	4.0804	450	25	38.8469	10.1524	299.655	93.0452
2015	2	NT	150	242.609	291.14	14.6517	13.6024	5.3848	81.5512	104.524	4611.51	2.37034	1.80787	4.46281	4.75623	463	30.7	41.5052	11.5974	330.971	74.2693
2015	2	NT	210	259.569	290.61	14.0942	10.1954	2.5024	68.0664	83.599	4257.4	2.18143	1.74253	4.24243	4.59986	458.5	30.62	39.6348	10.5565	314.011	91.7591
2015	3	DT	0	290.782	333.772	11.9269	10.54	3.49	72.92	89.84	4434.7	1.66009	1.3944	3.7077	3.70052	430	31.2	42.0699	11.516	305.378	79.8097
2015	3	DT	90	286.217	329.77	12.4425	16.1	6.66	76.26	102.87	4477.75	1.8524	1.58955	3.90852	3.99941	446.5	31.535	40.934	11.5063	309.943	79.2474
2015	3	DT	150	281.458	333.6	13.6705	21.85	8.87	98.88	135.24	5141.38	2.16224	1.69053	4.28365	4.52311	490.5	31.75	43.4209	13.3441	314.702	70.6578
2015	3	DT	210	275.615	319.26	13.2602	18.15	7.49	83.62	113.88	4708.63	2.02665	1.53966	4.12605	4.37593	464	29.06	40.7453	11.7835	320.545	79.1547
2015	3	NT	0	279.422	304.49	12.3752	8.66	3.96	60.38	75.65	3889.4	1.89018	1.43792	3.77324	3.84742	410.5	27.275	38.4139	9.97231	292.298	97.7318
2015	3	NT	90	274.725	302.31	12.9831	11.77	5.03	60.59	80.72	3986.83	1.91046	1.64077	3.95804	4.0952	438.5	25.125	38.6329	10.1651	296.995	95.2152
2015	3	NT	150	243.109	291.39	14.6408	15.19	4.74	84.75	108.77	4699.73	2.36017	1.82894	4.4464	4.74812	473	30.9	41.4767	11.6584	328.611	74.5193
2015	3	NT	210	245.413	286.1	14.0771	10.12	2.73	65.44	81.04	4283.53	2.19571	1.73127	4.25622	4.58993	431	30.5	39.2601	10.4885	326.307	82.113
2016	1	DT	0	340.288	300.321	13.6672	10.7781	3.95984	91.1095	108.593	4505	2.68767	1.52307	3.8934	3.94204	518.5	31.2	40.3679	14.0037	270.63	91.367
2016	1	DT	90	325.595	293.4	13.4236	15.8931	6.12415	100.859	126.825	4949.75	2.7081	1.52791	3.91532	3.96208	529	31.2	40.1326	14.6657	285.324	83.595
2016	1	DT	150	321.47	283.88	14.4995	21.7748	9.7471	132.004	168.667	5660.38	2.95386	1.70837	3.96152	4.19823	553	31.8571	41.8341	16.2757	289.449	88.99
2016	1	DT	210	325.469	288.19	14.0497	15.5622	7.08362	110.031	136.781	5058.25	2.93847	1.59659	3.87371	4.03664	560.5	31.2941	40.5224	14.7688	285.449	88.6795
2016	1	NT	0	325.185	304.79	13.4944	9.6623	3.36541	82.6106	97.9179	4237.45	2.49284	1.4328	3.65397	3.70558	480	30.9231	38.4537	13.6644	267.908	71.7945
2016	1	NT	90	309.68	298.24	13.6366	11.9044	5.1753	92.6512	112.951	4482.35	2.6183	1.46595	3.81022	3.89995	499	31.2143	39.3936	14.2342	283.413	62.84
2016	1	NT	150	327.89	283.64	13.9821	16.6098	8.05425	117.069	145.866	5145.33	2.74119	1.48596	3.85362	3.93808	526.5	32.0833	41.9535	15.6336	265.203	95.65
2016	1	NT	210	316.755	303.59	14.5691	10.9442	3.92802	92.1855	109.696	4403.1	2.75675	1.63606	4.02444	4.06823	539	30.3571	39.7771	14.633	276.338	64.565
2016	2	DT	0	343.248	304.512	13.4628	12.8619	4.36016	93.9105	113.627	4628.1	2.57178	1.50407	3.80997	3.92756	457.75	31	40.6462	14.1823	267.753	90.1363
2016	2	DT	90	329.115	289.09	13.8816	14.5669	6.47585	107.681	131.295	4818.15	2.66121	1.59363	3.83624	3.99131	464	31.55	40.9008	14.4748	281.886	91.425
2016	2	DT	150	346.84	279.32	14.2409	23.7652	9.7929	129.776	169.733	5489.7	2.85474	1.6711	4.06257	4.25148	508.75	32.3333	42.2727	16.058	264.161	118.92
2016	2	DT	210	329.42	291.33	14.1665	14.4778	5.69638	110.189	133.739	4932.2	3.03753	1.62659	3.97733	4.12371	468.25	31.8889	41.1968	14.9035	281.582	89.4895
2016	2	NT	0	321.964	308.59	13.3389	8.7977	3.01459	84.2094	97.9421	4065.1	2.61292	1.48514	3.71523	3.73738	443.75	30.8667	38.6946	13.8067	271.796	64.7745
2016	2	NT	90	312.62	294.68	13.3384	10.8356	4.1647	93.0488	110.129	4352.9	2.56201	1.53353	3.7391	3.82598	455.75	30.8333	38.928	14.0429	281.141	69.34
2016	2	NT	150	322.87	286.94	14.0911	17.0902	7.36575	113.251	142.834	5015.05	2.61381	1.56703	3.83328	4.01269	459.75	31.6667	41.8674	15.7613	270.891	87.33
2016	2	NT	210	321.725	298.61	14.1953	12.4558	3.81198	100.015	118.964	4523.1	2.80585	1.66583	3.95627	4.13205	456.25	30.5	39.2353	14.3669	272.036	74.515
2016	3	DT	0	341.768	302.417	13.565	11.82	4.16	92.51	111.12	4566.55	2.62972	1.51357	3.85168	3.9348	434	31.1	40.507	14.093	269.192	90.7516
2016	3	DT	90	327.355	291.245	13.6526	15.23	6.3	104.27	129.06	4883.95	2.68466	1.56077	3.87578	3.9767	452.75	31.375	40.5167	14.5702	283.605	87.51
2016	3	DT	150	334.155	281.6	14.3702	22.77	9.77	130.89	169.19	5575.04	2.9043	1.68973	4.01205	4.22485	486.75	32.0952	42.0534	16.1668	276.805	103.955
2016	3	DT	210	327.445	289.76	14.1081	15.02	6.39	110.11	135.26	4995.23	2.988	1.61159	3.92552	4.08018	459.5	31.5915	40.8596	14.8361	283.516	89.0845
2016	3	NT	0	323.575	306.69	13.4167	9.23	3.19	83.41	97.93	4151.27	2.55288	1.45897	3.6846	3.72148	413.5	30.8949	38.5742	13.7355	269.852	68.2845
2016	3	NT	90	311.15	296.46	13.4875	11.37	4.67	92.85	111.54	4417.62	2.59015	1.49974	3.77466	3.86297	435.5	31.0238	39.1608	14.1386	282.277	66.09
2016	3	NT	150	325.38	285.29	14.0366	16.85	7.71	115.16	144.36	5080.19	2.6775	1.52649	3.84345	3.97539	468.5	31.875	41.9104	15.6975	268.047	91.49
2016	3	NT	210	319.24	301.1	14.3822	11.7	3.87	96.1	114.33	4463.1	2.7813	1.65094	3.99036	4.10014	434.25	30.4286	39.5062	14.5	274.187	69.54

## Sheet: anova
				Water content
year	replicates	Tillage method	N	anthesis	Maturity	albumin	globulin	gliadin	glutenin	glu/gli	protein	Total N	yield
2014	1	DT	0	432.657	368.862	1.35	1.13	3.42	3.4	0.994152	10.76	136.82	5023.15
2014	1	DT	150	416.831	347.502	1.54	1.32	3.6	3.71	1.03056	11.67	159.9	5110.05
2014	1	DT	180	402.151	332.612	1.85	1.54	4.07	4.31	1.05897	13.6	175.48	5308.06
2014	1	DT	210	392.182	319.762	1.72	1.42	3.91	4.15	1.06138	12.26	159.37	5754.69
2014	1	NT	0	389.197	339.79	1.58	1.18	3.46	3.54	1.02312	11.35	128.26	4578.31
2014	1	NT	150	387.722	330.53	1.6	1.27	3.67	3.81	1.03815	11.96	146.93	4943.77
2014	1	NT	180	374.691	317.137	2.05	1.48	4.13	4.42	1.07022	13.94	159.18	4883.95
2014	1	NT	210	364.857	317.001	1.85	1.33	4.03	4.28	1.06203	12.97	148.45	5366.74
2014	2	DT	0	447.049	375.564	1.37	1.15	3.4	3.42	1.00588	10.8	146.44	4923.41
2014	2	DT	150	430.459	354.24	1.56	1.36	3.62	3.73	1.03039	11.69	152.76	5011.49
2014	2	DT	180	415.559	338.729	1.87	1.52	4.09	4.33	1.05868	13.62	180.26	5358.47
2014	2	DT	210	405.253	325.808	1.74	1.44	3.93	4.19	1.06616	12.3	159.07	5813.79
2014	2	NT	0	402.014	346.84	1.6	1.2	3.48	3.56	1.02299	11.37	133.78	4606.36
2014	2	NT	150	387.909	337.265	1.62	1.31	3.65	3.79	1.03836	11.98	144.57	4914.93
2014	2	NT	180	376.908	323.293	2.07	1.5	4.17	4.44	1.06475	13.98	167.9	4903.68
2014	2	NT	210	377.619	323.98	1.89	1.35	4.09	4.3	1.05134	12.99	152.59	5347.43
2014	3	DT	0	439.853	372.213	1.36	1.14	3.41	3.41	1	10.78	141.79	4973.28
2014	3	DT	150	423.645	350.871	1.55	1.34	3.61	3.72	1.03047	11.68	153.76	5060.77
2014	3	DT	180	408.855	335.67	1.86	1.53	4.08	4.32	1.05882	13.61	186.16	5333.26
2014	3	DT	210	398.718	322.785	1.73	1.43	3.92	4.17	1.06378	12.28	169.53	5784.24
2014	3	NT	0	395.605	343.315	1.59	1.19	3.47	3.55	1.02305	11.36	136.88	4592.34
2014	3	NT	150	387.815	333.898	1.61	1.29	3.66	3.8	1.03825	11.97	141.6	4929.35
2014	3	NT	180	375.799	320.215	2.06	1.49	4.15	4.43	1.06747	13.96	166.11	4893.82
2014	3	NT	210	371.238	320.491	1.87	1.34	4.06	4.29	1.05665	12.98	161.21	5357.09
2015	1	DT	0	298.382	330.032	1.64	1.37	3.7	3.71	1.0027	11.9	89.0836	4381.73
2015	1	DT	150	281.517	328.45	1.87	1.61	3.9	4.02	1.03077	12.41	97.702	4451.1
2015	1	DT	180	273.363	326.61	2.17	1.68	4.26	4.51	1.05869	13.65	127.97	5200.95
2015	1	DT	210	281.758	330.88	2.05	1.53	4.12	4.37	1.06068	13.25	110.183	4681.01
2015	1	NT	0	257.624	292.35	1.87	1.42	3.78	3.86	1.02116	12.37	77.6948	3832
2015	1	NT	150	243.609	291.64	1.94	1.63	3.94	4.11	1.04315	12.96	83.9914	3810.36
2015	1	NT	180	241.326	278.86	2.35	1.85	4.43	4.74	1.06998	14.63	112.996	4787.95
2015	1	NT	210	231.257	281.59	2.21	1.72	4.27	4.58	1.0726	14.06	78.481	4309.65
2015	2	DT	0	283.182	337.512	1.68018	1.4188	3.7154	3.69105	0.993445	11.9538	90.5964	4487.67
2015	2	DT	150	290.917	331.09	1.83479	1.56911	3.91705	3.97882	1.01577	12.4751	108.038	4504.4
2015	2	DT	180	283.163	323.35	2.15447	1.70105	4.30731	4.53622	1.05314	13.691	142.51	5081.81
2015	2	DT	210	281.158	336.32	2.00329	1.54932	4.13211	4.38185	1.06044	13.2703	117.577	4736.26
2015	2	NT	0	257.024	302.79	1.91037	1.45583	3.76649	3.83484	1.01815	12.3805	73.6052	3946.8
2015	2	NT	150	242.609	291.14	1.88092	1.65155	3.97608	4.0804	1.02624	13.0061	77.4486	4163.31
2015	2	NT	180	249.726	284.25	2.37034	1.80787	4.46281	4.75623	1.06575	14.6517	104.524	4611.51
2015	2	NT	210	259.569	290.61	2.18143	1.74253	4.24243	4.59986	1.08425	14.0942	83.599	4257.4
2015	3	DT	0	290.782	333.772	1.66009	1.3944	3.7077	3.70052	0.998064	11.9269	89.84	4434.7
2015	3	DT	150	286.217	329.77	1.8524	1.58955	3.90852	3.99941	1.02325	12.4425	102.87	4477.75
2015	3	DT	180	278.263	324.98	2.16224	1.69053	4.28365	4.52311	1.0559	13.6705	135.24	5141.38
2015	3	DT	210	281.458	333.6	2.02665	1.53966	4.12605	4.37593	1.06056	13.2602	113.88	4708.63
2015	3	NT	0	257.324	297.57	1.89018	1.43792	3.77324	3.84742	1.01966	12.3752	75.65	3889.4
2015	3	NT	150	243.109	291.39	1.91046	1.64077	3.95804	4.0952	1.03465	12.9831	80.72	3986.83
2015	3	NT	180	245.526	281.555	2.36017	1.82894	4.4464	4.74812	1.06786	14.6408	108.77	4699.73
2015	3	NT	210	245.413	286.1	2.19571	1.73127	4.25622	4.58993	1.07841	14.0771	81.04	4283.53
2016	1	DT	0	340.288	300.321	2.68767	1.52307	3.8934	3.94204	1.01249	13.6672	108.593	4505
2016	1	DT	150	325.595	293.4	2.7081	1.52791	3.91532	3.96208	1.01194	13.4236	126.825	4949.75
2016	1	DT	180	306.73	284.61	2.95386	1.70837	3.96152	4.19823	1.05975	14.4995	168.667	5660.38
2016	1	DT	210	321.47	283.88	2.93847	1.59659	3.87371	4.03664	1.04206	14.0497	136.781	5058.25
2016	1	NT	0	315.99	296.35	2.49284	1.4328	3.65397	3.70558	1.01412	13.4944	97.9179	4237.45
2016	1	NT	150	327.89	283.64	2.6183	1.46595	3.81022	3.89995	1.02355	13.6366	112.951	4482.35
2016	1	NT	180	316.118	290.86	2.74119	1.48596	3.85362	3.93808	1.02192	13.9821	145.866	5145.33
2016	1	NT	210	316.755	303.59	2.75675	1.63606	4.02444	4.06823	1.01088	14.5691	109.696	4403.1
2016	2	DT	0	343.248	304.512	2.57178	1.50407	3.80997	3.92756	1.03087	13.4628	113.627	4628.1
2016	2	DT	150	329.115	289.09	2.66121	1.59363	3.83624	3.99131	1.04042	13.8816	131.295	4818.15
2016	2	DT	180	303.44	291.35	2.85474	1.6711	4.06257	4.25148	1.0465	14.2409	169.733	5489.7
2016	2	DT	210	346.84	279.32	3.03753	1.62659	3.97733	4.12371	1.0368	14.1665	133.739	4932.2
2016	2	NT	0	302.029	291.59	2.61292	1.48514	3.71523	3.73738	1.00596	13.3389	97.9421	4065.1
2016	2	NT	150	322.87	286.94	2.56201	1.53353	3.7391	3.82598	1.02324	13.3384	110.129	4352.9
2016	2	NT	180	331.408	295.25	2.61381	1.56703	3.83328	4.01269	1.0468	14.0911	142.834	5015.05
2016	2	NT	210	321.725	298.61	2.80585	1.66583	3.95627	4.13205	1.04443	14.1953	118.964	4523.1
2016	3	DT	0	341.768	302.417	2.62972	1.51357	3.85168	3.9348	1.02168	13.565	111.12	4566.55
2016	3	DT	150	327.355	291.245	2.68466	1.56077	3.87578	3.9767	1.02618	13.6526	129.06	4883.95
2016	3	DT	180	305.085	287.98	2.9043	1.68973	4.01205	4.22485	1.05313	14.3702	169.19	5575.04
2016	3	DT	210	334.155	281.6	2.988	1.61159	3.92552	4.08018	1.03943	14.1081	135.26	4995.23
2016	3	NT	0	309.01	293.97	2.55288	1.45897	3.6846	3.72148	1.01004	13.4167	97.93	4151.27
2016	3	NT	150	325.38	285.29	2.59015	1.49974	3.77466	3.86297	1.02339	13.4875	111.54	4417.62
2016	3	NT	180	323.763	293.055	2.6775	1.52649	3.84345	3.97539	1.03436	14.0366	144.36	5080.19
2016	3	NT	210	319.24	301.1	2.7813	1.65094	3.99036	4.10014	1.02766	14.3822	114.33	4463.1

## Sheet: evapotranspiration
									ΔSWS									Δs-a						Δa-m
year	rep	Tillage method	N	BEFORE SOWING	anthesis	Maturity	Ps-a	Pa-m	Δs-a	Δa-m								average						average
2014	1	DT	0	603.23	432.657	368.862	133.5	17.6	304.073	81.3953		2014	DT	0	304.073	298.367	301.22	301.22			81.3953	89.0852	85.2402	85.2402
2014	1	DT	90	603.23	416.831	347.502	133.5	17.6	319.899	86.9292			DT	90	319.899	314.957	317.428	317.428			86.9292	93.8195	90.3743	90.3743
2014	1	DT	150	603.23	392.182	319.762	133.5	17.6	344.548	90.02			DT	150	344.548	340.163	342.355	342.355			90.02	97.0447	93.5324	93.5324
2014	1	DT	210	603.23	375.469	315.515	133.5	17.6	361.261	77.5544			DT	210	361.261	356.444	358.852	358.852			77.5544	85.0704	81.3124	81.3124
2014	1	NT	0	588.56	423.335	372.083	133.5	17.6	298.725	68.8516			NT	0	298.725	293.664	296.195	296.195			68.8516	75.1679	72.0098	72.0098
2014	1	NT	90	588.56	403.229	354.75	133.5	17.6	318.831	66.079			NT	90	318.831	314.182	316.506	316.506			66.079	72.4523	69.2657	69.2657
2014	1	NT	150	588.56	387.722	330.53	133.5	17.6	334.338	74.792			NT	150	334.338	343.106	338.722	338.722			74.792	68.2433	71.5176	71.5176
2014	1	NT	210	588.56	364.857	317.001	133.5	17.6	357.203	65.4557			NT	210	357.203	353.395	355.299	355.299			65.4557	71.2395	68.3476	68.3476
2014	2	DT	0	611.916	447.049	375.564	133.5	17.6	298.367	89.0852		2015	DT	0	300.138	310.618	305.378	305.378			91.1497	68.4697	79.8097	79.8097
2014	2	DT	90	611.916	430.459	354.24	133.5	17.6	314.957	93.8195			DT	90	317.003	302.883	309.943	309.943			75.8674	82.6274	79.2474	79.2474
2014	2	DT	150	611.916	405.253	325.808	133.5	17.6	340.163	97.0447			DT	150	316.762	312.642	314.702	314.702			73.6778	67.6378	70.6578	70.6578
2014	2	DT	210	611.916	388.972	321.502	133.5	17.6	356.444	85.0704			DT	210	328.039	313.052	320.545	320.545			78.0914	80.2181	79.1547	79.1547
2014	2	NT	0	597.515	437.35	379.782	133.5	17.6	293.664	75.1679			NT	0	289.638	294.958	292.298	292.298			98.4318	97.0318	97.7318	97.7318
2014	2	NT	90	597.515	416.833	361.98	133.5	17.6	314.182	72.4523			NT	90	294.335	299.655	296.995	296.995			97.3852	93.0452	95.2152	95.2152
2014	2	NT	150	597.515	387.909	337.265	133.5	17.6	343.106	68.2433			NT	150	326.251	330.971	328.611	328.611			74.7693	74.2693	74.5193	74.5193
2014	2	NT	210	597.515	377.619	323.98	133.5	17.6	353.395	71.2395			NT	210	338.603	314.011	326.307	326.307			72.4669	91.7591	82.113	82.113
2014	3	DT	0	607.573	439.853	372.213	133.5	17.6	301.22	85.2402		2016	DT	0	270.63	267.753	269.192	269.192			91.367	90.1363	90.7516	90.7516
2014	3	DT	90	607.573	423.645	350.871	133.5	17.6	317.428	90.3743			DT	90	285.324	281.886	283.605	283.605			83.595	91.425	87.51	87.51
2014	3	DT	150	607.573	398.718	322.785	133.5	17.6	342.355	93.5324			DT	150	289.449	264.161	276.805	276.805			88.99	118.92	103.955	103.955
2014	3	DT	210	607.573	382.221	318.508	133.5	17.6	358.852	81.3124			DT	210	285.449	281.582	283.516	283.515			88.6795	89.4895	89.0845	89.0845
2014	3	NT	0	593.037	430.343	375.933	133.5	17.6	296.195	72.0098			NT	0	267.908	271.796	269.852	269.852			71.7945	64.7745	68.2845	68.2845
2014	3	NT	90	593.037	410.031	358.365	133.5	17.6	316.506	69.2657			NT	90	283.413	281.141	282.277	282.277			62.84	69.34	66.09	66.09
2014	3	NT	150	593.037	387.815	333.898	133.5	17.6	338.722	71.5176			NT	150	265.203	270.891	268.047	268.047			95.65	87.33	91.49	91.49
2014	3	NT	210	593.037	371.238	320.491	133.5	17.6	355.299	68.3476			NT	210	276.338	272.036	274.187	274.187			64.565	74.515	69.54	69.54

## Sheet: dry biomass
rep	T	N	wintering	jointing	booting	anthesis	maturity
1	dt	0	1.9412	2.53919	7.6608	9.20375	14.8841
1	dt	90	2.24981	2.85776	8.3566	9.85023	16.1528
1	dt	150	2.78829	3.41814	10.2211	11.3913	18.1648
1	dt	210	2.32047	3.26795	9.7963	10.8319	17.0069
1	nt	0	1.87734	2.53721	7.021	8.94167	14.646
1	nt	90	2.1942	2.5519	7.9633	9.09794	14.6017
1	nt	150	2.61441	3.18313	9.8668	10.4468	16.4958
1	nt	210	2.26044	3.02813	9.7632	10.6786	15.9867
2	dt	0	1.99755	2.69627	7.8662	9.55586	15.1441
2	dt	90	2.20455	2.84698	8.4605	10.0505	16.2278
2	dt	150	2.63097	3.54559	10.3345	11.8866	18.2908
2	dt	210	2.40419	3.08851	9.9325	10.6944	16.7733
2	nt	0	1.82081	2.46617	6.9682	9.01518	14.6311
2	nt	90	2.18017	2.68899	8.2142	8.96734	14.6995
2	nt	150	2.45709	3.46337	9.7587	11.0063	16.6359
2	nt	210	2.22732	3.1251	9.8002	10.4985	15.6221
3	dt	0	1.96938	2.61773	7.7635	9.3798	15.0141
3	dt	90	2.22718	2.85237	8.40855	9.95034	16.1903
3	dt	150	2.70963	3.48187	10.2778	11.6389	18.2278
3	dt	210	2.36233	3.17823	9.8644	10.7631	16.8901
3	nt	0	1.84907	2.50169	6.9946	8.97842	14.6385
3	nt	90	2.18718	2.62044	8.08875	9.03264	14.6506
3	nt	150	2.53575	3.32325	9.81275	10.7265	16.5658
3	nt	210	2.24388	3.07662	9.7817	10.5886	15.8044

## Sheet: biomass2
2014-2015
		Wintering					jointing															booting stage															anthesis
Dry biomass（kg/ha）		total plant					leaf					Stem					total plant					leaf					Spike					total plant					leaf					stem					spike
tillage	N (kg/ha)	repeat1	repeat2	Average	S.E		repeat1	repeat2	Average	S.E		repeat1	repeat2	Average	S.E		repeat1	repeat2	Average	S.E		repeat1	repeat2	Average	S.E		repeat1	repeat2	Average	S.E		repeat1	repeat2	Average	S.E		repeat1	repeat2	Average	S.E		repeat1	repeat2	Average	S.E		repeat1	repeat2	Average
deep tillage	0	1941.2	1997.55	1969.38	39.8455	g	2065.86	2009.63	2037.74	39.7597	g	473.339	686.645	579.992	150.83	bcd	2539.19	2696.27	2617.73	111.071	f	3421.16	2676.86	3049.01	526.3	d	4239.64	5189.34	4714.49	671.54	c	7660.8	7866.2	7763.5	145.24	i	1429.38	2976.58	2202.98	1094.03	cd	4721.16	3576.86	4149.01	809.143	abcde	3053.2	3002.42	3027.81
	90	2249.81	2204.55	2227.18	32.0037	ef	2262.87	2195.14	2229.01	47.8963	f	594.887	651.84	623.364	40.2717	bcd	2857.76	2846.98	2852.37	7.62464	e	3255.2	3297.79	3276.5	30.1135	cd	5101.4	5162.71	5132.05	43.3549	c	8356.6	8460.5	8408.55	73.4684	g	2187.27	2362.1	2274.68	123.621	cd	4255.2	4297.79	4276.5	30.1135	abcd	3407.75	3390.57	3399.16
	120	2502.63	2378.43	2440.53	87.8227	cd	2571.98	2560.07	2566.03	8.42164	bc	565.471	598.963	582.217	23.6826	bcd	3137.45	3159.03	3148.24	15.261	cd	4237.07	4668.82	4452.95	305.297	ab	5223.01	5001.18	5112.09	156.862	c	9460.08	9670	9565.04	148.436	e	2797.86	2763.69	2780.77	24.1567	bcd	4237.07	4668.82	4452.95	305.297	abc	3533.8	3541.44	3537.62
	150	2788.29	2630.97	2709.63	111.242	b	2657.86	2720.36	2689.11	44.1928	b	760.279	825.23	792.755	45.9274	ab	3418.14	3545.59	3481.87	90.1203	ab	4069.45	3574.25	3821.85	350.158	bc	6151.65	6760.25	6455.95	430.344	b	10221.1	10334.5	10277.8	80.1859	b	3243.86	3823.1	3533.48	409.586	ab	4512.55	4275.85	4394.2	167.371	abc	3634.85	3787.67	3711.26
	180	3099.48	3165.03	3132.26	46.3508	a	3074.46	3098.56	3086.51	17.0369	a	541.769	480.507	511.138	43.3181	de	3616.23	3579.06	3597.65	26.2813	a	4861.05	3892.82	4376.93	684.64	ab	5803.15	6643.28	6223.22	594.059	b	10664.2	10536.1	10600.2	90.5804	a	2371.83	2673.82	2522.82	213.536	bcd	5417.95	4691.22	5054.58	513.874	ab	4358.48	4982.88	4670.68
	210	2320.47	2404.19	2362.33	59.199	de	2605.74	2713.59	2659.67	76.2606	b	662.211	374.92	518.565	203.146	cde	3267.95	3088.51	3178.23	126.885	cd	2226.26	2286.23	2256.25	42.406	e	7570.04	7646.27	7608.15	53.9019	a	9796.3	9932.5	9864.4	96.3079	cd	4052.72	4399.89	4226.3	245.481	a	2186.26	1986.23	2086.25	141.442	f	4592.91	4308.25	4450.58
no tillage	0	1877.34	1820.81	1849.07	39.9727	g	2017.62	2090.14	2053.88	51.2807	g	519.595	376.024	447.809	101.52	de	2537.21	2466.17	2501.69	50.2391	f	3438.03	2791.29	3114.66	457.315	d	3582.97	4176.91	3879.94	419.979	d	7021	6968.2	6994.6	37.3352	j	2484.11	3108.76	2796.43	441.694	bcd	3438.03	2791.29	3114.66	457.315	ef	3019.53	3115.13	3067.33
	90	2194.2	2180.17	2187.18	9.92071	f	2352.37	2281.07	2316.72	50.4149	ef	199.534	407.918	303.726	147.349	e	2551.9	2688.99	2620.44	96.9342	f	3273.78	3071.7	3172.74	142.889	cd	4689.52	5142.5	4916.01	320.302	c	7963.3	8214.2	8088.75	177.413	h	2341.69	2443.68	2392.69	72.1122	cd	3273.78	3071.7	3172.74	142.889	def	3482.46	3451.96	3467.21
	120	2312.88	2258.37	2285.62	38.5444	ef	2444.82	2499.25	2472.04	38.4834	cd	706.578	544.758	625.668	114.424	bcd	3151.4	3044.01	3097.7	75.9407	d	4352.97	4282.04	4317.51	50.1551	ab	4858.83	5138.98	4998.9	198.096	c	9211.8	9421.02	9316.41	147.941	f	3569.21	2455.55	3012.38	787.478	bc	3252.97	4182.04	3717.51	656.952	cde	3581.44	3553.04	3567.24
	150	2614.41	2457.09	2535.75	111.242	c	2322.13	2529.98	2426.06	146.971	de	860.997	933.391	897.194	51.1902	a	3183.13	3463.37	3323.25	198.161	bc	4389.19	4351.53	4370.36	26.6303	ab	5477.61	5407.17	5442.39	49.808	c	9866.8	9758.7	9812.75	76.4382	cd	2098.15	1319.01	1708.58	550.935	d	4389.19	5851.53	5120.36	1034.03	a	3959.41	3835.77	3897.59
	180	2734.47	2892.79	2813.63	111.949	b	2682.23	2636.2	2659.22	32.5464	b	715.404	793.281	754.342	55.0671	abc	3397.63	3429.48	3413.56	22.5208	ab	4629.62	4638.72	4634.17	6.43196	a	5435.38	5371.98	5403.68	44.8279	c	10065	10010.7	10037.9	38.3959	c	3348.77	2770.68	3059.72	408.77	bc	4429.62	4938.72	4684.17	359.985	abc	4255.37	4284.43	4269.9
	210	2260.44	2227.32	2243.88	23.4194	ef	2450.51	2329.13	2389.82	85.833	de	577.616	795.975	686.795	154.403	abcd	3028.13	3125.1	3076.62	68.5698	d	4554.84	4587.43	4571.14	23.0498	a	5208.36	5212.77	5210.56	3.11311	c	9763.2	9800.2	9781.7	26.163	de	3051.03	2247.84	2649.43	567.939	bcd	3654.84	4287.43	3971.14	447.314	bcde	3972.77	3963.23	3968
[truncated: 37 more columns]

## Sheet: precipitation
Precipitation in Wenxi site （mm）
Year	fallow period	sowing-wintering	wintering-jointing	jointing-anthesis	anthesis-maturity	total
2005—2014 mean	268.39	50.01	30.89	33.4	63.8	446.5
	±51.61	±17.28	±12.67	±22.08	±12.92	±18.93
2009—2010	173.1	64.5	12.6	33.9	50.9	335	Dry year
2010—2011	401.5	27.1	19.1	22.2	64.8	534.7	Normal year
2011—2012	459.9	137.4	28.2	20.5	27.1	673.1	Rain year
2012—2013	171.1	19.8	26.3	20.8	104.9	342.9	Dry year
2013—2014	283.7	43.7	19.3	63.8	63.7	474.2	Normal year
2014—2015	365.6	21.5	50.8	61.2	17.6	516.7	Normal year
2015-2016	94.7	101.2	11	57.1	122.8	386.8	Dry year
2016-2017	165.4	95.5	66.8	27.2	51.4	406.3	Dry year
Year
	fallow period	sowing-wintering	wintering-jointing	jointing-anthesis	anthesis-maturity	total	S-A	A-M
2005—2014 mean	268.39	50.01	30.89	33.4	63.8	446.5
2014—2015	365.6	21.5	50.8	61.2	17.6	516.7	133.5	17.6
2015-2016	94.7	101.2	11	57.1	122.8	386.8	169.3	122.8
2016-2017	165.4	95.5	66.8	27.2	51.4	406.3	189.5	51.4

## Sheet: SWS
2014-2015
Sowing stage		Repeat 1	Repeat 2	20	S.E		Repeat 1	Repeat 2	40	S.E		Repeat 1	Repeat 2	60	S.E		Repeat 1	Repeat 2	80	S.E		Repeat 1	Repeat 2	100	S.E		Repeat 1	Repeat 2	120
	No tillage	45.4267	45.8267	45.6267	0.282843		44.2567	44.1367	44.1967	0.0848526		43.0767	44.1967	43.6367	0.79196		44.9367	45.8967	45.4167	0.678822		43.8867	44.9867	44.4367	0.777817		41.6967	42.5367	42.1167
	Deep tillage	48.0933	47.2533	47.6733	0.59397		46.1233	45.4633	45.7933	0.46669		44.8733	43.0733	43.9733	1.27279		46.9033	46.8233	46.8633	0.0565685		45.5633	45.7633	45.6633	0.141421		45.9233	44.1233	45.0233
Havest stage		Repeat 1	Repeat 2	20	S.E		Repeat 1	Repeat 2	40	S.E		Repeat 1	Repeat 2	60	S.E		Repeat 1	Repeat 2	80	S.E		Repeat 1	Repeat 2	100	S.E		Repeat 1	Repeat 2	120
	No tillage	20.03	21.3983	20.7142	0.967551		20	20.8554	20.4277	0.604832		17.98	18.7913	18.3857	0.573676		20.11	21.4696	20.7898	0.961395		19.83	18.5146	19.1723	0.930129		19.05	20.4143	19.7321
	Deep tillage	24.31	25.4524	24.8812	0.807803		22.94	22.5472	22.7436	0.277766		21	21.383	21.1915	0.270807		21.77	23.0782	22.4241	0.925056		24.99	24.0829	24.5365	0.641405		22.48	22.1622	22.3211
2015-2016
Sowing stage		Repeat 1	Repeat 2	20	S.E		Repeat 1	Repeat 2	40	S.E		Repeat 1	Repeat 2	60	S.E		Repeat 1	Repeat 2	80	S.E		Repeat 1	Repeat 2	100	S.E		Repeat 1	Repeat 2	120
	No tillage	34.6067	34.7533	34.68	0.103709		34.2167	34.7233	34.47	0.358267		33.3867	32.4933	32.94	0.631682		32.1467	32.0933	32.12	0.0377126		29.7967	30.1433	29.97	0.24513		27.7767	28.3233	28.05
	Deep tillage	33.1761	33.2312	33.2036	0.0389816		32.7061	34.3212	33.5136	1.14207		32.9761	32.3112	32.6436	0.470135		32.7861	32.2412	32.5136	0.385283		30.2361	29.1112	29.6736	0.795404		27.4761	27.0512	27.2636
Havest stage		Repeat 1	Repeat 2	20	S.E		Repeat 1	Repeat 2	40	S.E		Repeat 1	Repeat 2	60	S.E		Repeat 1	Repeat 2	80	S.E		Repeat 1	Repeat 2	100	S.E		Repeat 1	Repeat 2	120
	No tillage	23.6158	24.836	24.2259	0.862812		24.6628	23.6865	24.1747	0.690317		21.6633	22.1065	21.8849	0.313432		20.4481	21.7857	21.1169	0.945831		20.3213	21.4929	20.9071	0.828462		20.8738	19.8042	20.339
	Deep tillage	24.3347	24.9478	24.6412	0.433484		22.8014	23.2016	23.0015	0.282997		21.4044	22.0426	21.7235	0.451301		20.389	21.2141	20.8016	0.583424		20.1703	20.5127	20.3415	0.242097		18.5992	19.0316	18.8154
2016-2017
Sowing stage		Repeat 1	Repeat 2	20	S.E		Repeat 1	Repeat 2	40	S.E		Repeat 1	Repeat 2	60	S.E		Repeat 1	Repeat 2	80	S.E		Repeat 1	Repeat 2	100	S.E		Repeat 1	Repeat 2	120
	No tillage	30.76	31.1384	30.9492	0.267567		31	29.2206	30.1103	1.25822		30.01	29.2634	29.6367	0.52791		28.56	28.3518	28.4559	0.147224		26.62	26.2927	26.4564	0.231429		22.04	21.9476	21.9938
	Deep tillage	32.19	32.9726	32.5813	0.553383		30.98	32.8555	31.9177	1.32618		31.63	31.9952	31.8126	0.258231		30.98	30.1036	30.5418	0.619729		27.01	25.5863	26.2982	1.00667		23.4	23.3709	23.3855
Havest stage

## Sheet: Sheet10
2014-2015
		Albumin（%）					Globulin（%）					Gliadin（%）					Glutenin（%）					Glu/Gli					Protein（%）
Tillage method	Nitrogen (kg/ha)	Repeat 1	Repeat 2	average	S.E		Repeat 1	Repeat 2	average	S.E		Repeat 1	Repeat 2	average	S.E		Repeat 1	Repeat 2	average	S.E		Repeat 1	Repeat 2	average	S.E		Repeat 1	Repeat 2	average	S.E
DT	0	1.35	1.37	1.36	0.0141421	d	1.13	1.15	1.14	0.0141421	d	3.42	3.4	3.41	0.0141421	e	3.4	3.42	3.41	0.0141421	e	0.994152	1.00588	1	0.00829458	d	10.76	10.8	10.78	0.0282843	f
	90	1.54	1.56	1.55	0.0141421	c	1.32	1.36	1.34	0.0282843	c	3.6	3.62	3.61	0.0141421	d	3.71	3.73	3.72	0.0141421	d	1.03056	1.03039	1.03047	0.00011937	c	11.67	11.69	11.68	0.0141421	e
	150	1.85	1.87	1.86	0.0141421	a	1.54	1.52	1.53	0.0141421	a	4.07	4.09	4.08	0.0141421	a	4.31	4.33	4.32	0.0141421	a	1.05897	1.05868	1.05882	0.000203896	b	13.6	13.62	13.61	0.0141421	a
	210	1.72	1.74	1.73	0.0141421	b	1.42	1.44	1.43	0.0141421	b	3.91	3.93	3.92	0.0141421	b	4.15	4.19	4.17	0.0282843	b	1.06138	1.06616	1.06378	0.00337763	b	12.26	12.3	12.28	0.0282843	d
NT	0	1.58	1.6	1.59	0.0141421	e	1.18	1.2	1.19	0.0141421	d	3.46	3.48	3.47	0.0141421	e	3.54	3.56	3.55	0.0141421	f	1.02312	1.02299	1.02305	9.39614e-05	c	11.35	11.37	11.36	0.0141421	f
	90	1.6	1.62	1.61	0.0141421	e	1.27	1.31	1.29	0.0282843	c	3.67	3.65	3.66	0.0141421	d	3.81	3.79	3.8	0.0141421	e	1.03815	1.03836	1.03825	0.000147803	b	11.96	11.98	11.97	0.0141421	e
	150	2.05	2.07	2.06	0.0141421	a	1.48	1.5	1.49	0.0141421	a	4.13	4.17	4.15	0.0282843	a	4.42	4.44	4.43	0.0141421	a	1.07022	1.06475	1.06747	0.00386767	a	13.94	13.98	13.96	0.0282843	a
	210	1.85	1.89	1.87	0.0282843	c	1.33	1.35	1.34	0.0141421	b	4.03	4.09	4.06	0.0424264	b	4.28	4.3	4.29	0.0141421	c	1.06203	1.05134	1.05665	0.00755897	ab	12.97	12.99	12.98	0.0141421	c
2015-2016
		Albumin（%）					Globulin（%）					Gliadin（%）					Glutenin（%）					Glu/Gli					Protein（%）
Tillage method	Nitrogen (kg/ha)	Repeat 1	Repeat 2	average	S.E		Repeat 1	Repeat 2	average	S.E		Repeat 1	Repeat 2	average	S.E		Repeat 1	Repeat 2	average	S.E		Repeat 1	Repeat 2	average	S.E		Repeat 1	Repeat 2	average	S.E
DT	0	1.64	1.68018	1.66009	0.0284145	d	1.37	1.4188	1.3944	0.0345057	d	3.7	3.7154	3.7077	0.0108903	e	3.71	3.69105	3.70052	0.0134025	e	1.0027	0.993445	0.998064	0.00654634	c	11.9	11.9538	11.9269	0.0380486	f
	90	1.87	1.83479	1.8524	0.0248949	c	1.61	1.56911	1.58955	0.0289146	bc	3.9	3.91705	3.90852	0.0120537	d	4.02	3.97882	3.99941	0.0291157	d	1.03077	1.01577	1.02325	0.010605	b	12.41	12.4751	12.4425	0.0460097	e
	150	2.17	2.15447	2.16224	0.0109793	a	1.68	1.70105	1.69053	0.0148874	a	4.26	4.30731	4.28365	0.0334531	a	4.51	4.53622	4.52311	0.0185416	a	1.05869	1.05314	1.0559	0.0039177	a	13.65	13.691	13.6705	0.0290053	a
	210	2.05	2.00329	2.02665	0.0330257	b	1.53	1.54932	1.53966	0.0136642	c	4.12	4.13211	4.12605	0.00856166	b	4.37	4.38185	4.37593	0.00838201	b	1.06068	1.06044	1.06056	0.000169203	a	13.25	13.2703	13.2602	0.014355	c
NT	0	1.87	1.91037	1.89018	0.0285443	c	1.42	1.45583	1.43792	0.0253387	e	3.78	3.76649	3.77324	0.00955339	f	3.86	3.83484	3.84742	0.0177888	f	1.02116	1.01815	1.01966	0.00213282	c	12.37	12.3805	12.3752	0.00740775	f
	90	1.94	1.88092	1.91046	0.0417755	c	1.63	1.65155	1.64077	0.0152371	d	3.94	3.97608	3.95804	0.0255137	e	4.11	4.0804	4.0952	0.0209279	e	1.04315	1.02624	1.03465	0.0119571	b	12.96	13.0061	12.9831	0.0326227	e
	150	2.35	2.37034	2.36017	0.0143851	a	1.85	1.80787	1.82894	0.029789	a	4.43	4.46281	4.4464	0.0231974	a	4.74	4.75623	4.74812	0.0114773	a	1.06998	1.06575	1.06786	0.00298992	a	14.63	14.6517	14.6408	0.0153408	a
	210	2.21	2.18143	2.19571	0.0202051	b	1.72	1.74253	1.73127	0.0159345	bc	4.27	4.24243	4.25622	0.0194942	c	4.58	4.59986	4.58993	0.0140429	c	1.0726	1.08425	1.07841	0.00823877	a	14.06	14.0942	14.0771	0.0241896	c
2016-2017
tillage	Nitrogen (kg/ha)	Repeat 1	Repeat 2	average	S.E		Repeat 1	Repeat 2	average	S.E		Repeat 1	Repeat 2	average	S.E		Repeat 1	Repeat 2	average	S.E		Repeat 1	Repeat 2	average	S.E		Repeat 1	Repeat 2	average	S.E
DT	0	2.68767	2.57178	2.62972	0.0819475	c	1.52307	1.50407	1.51357	0.0134395	d	3.8934	3.80997	3.85168	0.0589987	c	3.94204	3.92756	3.9348	0.0102356	d	1.01249	1.03087	1.02168	0.0129923	b	13.6672	13.4628	13.565	0.144592	c
	90	2.7081	2.66121	2.68466	0.0331581	c	1.52791	1.59363	1.56077	0.0464712	cd	3.91532	3.83624	3.87578	0.0559192	bc	3.96208	3.99131	3.9767	0.020672	d	1.01194	1.04042	1.02618	0.0201392	ab	13.4236	13.8816	13.6526	0.323801	c
	150	2.95386	2.85474	2.9043	0.0700882	b	1.70837	1.6711	1.68973	0.0263512	b	3.96152	4.06257	4.01205	0.0714496	b	4.19823	4.25148	4.22485	0.0376566	b	1.05975	1.0465	1.05313	0.00936897	a	14.4995	14.2409	14.3702	0.182878	b
	210	2.93847	3.03753	2.988	0.0700444	b	1.59659	1.62659	1.61159	0.0212122	c	3.87371	3.97733	3.92552	0.0732722	bc	4.03664	4.12371	4.08018	0.0615653	c	1.04206	1.0368	1.03943	0.00371827	ab	14.0497	14.1665	14.1081	0.0825803	b
NT	0	2.49284	2.61292	2.55288	0.0849067	d	1.4328	1.48514	1.45897	0.0370096	b	3.65397	3.71523	3.6846	0.0433206	d	3.70558	3.73738	3.72148	0.0224877	e	1.01412	1.00596	1.01004	0.00577212	a	13.4944	13.3389	13.4167	0.109952	c
	90	2.6183	2.56201	2.59015	0.0398055	cd	1.46595	1.53353	1.49974	0.0477882	b	3.81022	3.7391	3.77466	0.0502913	cd	3.89995	3.82598	3.86297	0.052307	d	1.02355	1.02324	1.02339	0.000222351	a	13.6366	13.3384	13.4875	0.210844	c
	150	2.74119	2.61381	2.6775	0.0900717	bcd	1.48596	1.56703	1.52649	0.0573251	b	3.85362	3.83328	3.84345	0.014381	c	3.93808	4.01269	3.97539	0.0527581	c	1.02192	1.0468	1.03436	0.017597	a	13.9821	14.0911	14.0366	0.0770459	b
	210	2.75675	2.80585	2.7813	0.0347168	b	1.63606	1.66583	1.65094	0.02105	a	4.02444	3.95627	3.99036	0.0482021	b	4.06823	4.13205	4.10014	0.0451317	b	1.01088	1.04443	1.02766	0.0237239	a	14.5691	14.1953	14.3822	0.264305	b

## Sheet: Plant N
Table Every plant orgen nitrogen content in maturity（2014-2015）
Yield	Nitrogen			Leaf			stem +Sheath			Glume + Spike			Grain			Total
	（kg/ha）			（kg/ha）			（kg/ha）			（kg/ha）			（kg/ha）			（kg/ha）
		Repeat 1	Repeat 2	average	Repeat 1	Repeat 2	average	Repeat 1	Repeat 2	average	Repeat 1	Repeat 2	average	Repeat 1	Repeat 2	average
DT	0	3.85	3.33	3.59	13.15	12.83	12.99	5.71	6.17	5.94	114.11	124.11	119.11	136.82	146.44	141.79
	90	4.07	3.65	3.86	13.32	12	12.66	8.25	8.85	8.55	134.26	128.26	131.26	159.9	152.76	153.76
	120	4.65	4.61	4.63	13.01	11.73	12.37	10.2	9.92	10.06	135.32	132.96	134.14	163.18	159.22	164.65
	150	7.34	7.68	7.51	14.27	14.19	14.23	8.02	8.52	8.27	145.85	149.87	147.86	175.48	180.26	186.16
	180	7.24	7.6	7.42	17.26	17.38	17.32	6.15	5.93	6.04	154.31	154.57	154.44	184.96	185.48	199.1
	210	5.25	5.53	5.39	14.02	13.16	13.59	6.59	6.73	6.66	133.51	133.65	133.58	159.37	159.07	169.53
NT	0	3.37	3.19	3.28	13.01	11.63	12.32	6.53	6.73	6.63	105.35	112.23	108.79	128.26	133.78	136.88
	90	4.34	4.74	4.54	12.27	13.21	12.74	4.52	5.1	4.81	125.8	121.52	123.66	146.93	144.57	141.6
	120	6.05	6.49	6.27	14.11	13.71	13.91	4.75	4.65	4.7	124.27	126.27	125.27	149.18	151.12	157.81
	150	4.26	5.28	4.77	17.12	16.52	16.82	7.24	7.74	7.49	130.56	138.36	134.46	159.18	167.9	166.11
	180	6.55	6.89	6.72	19.01	19.05	19.03	6.23	6.35	6.29	135.38	143	139.19	167.17	175.29	185.31
	210	3.74	3.88	3.81	11.27	10.97	11.12	8.12	8.34	8.23	125.32	129.4	127.36	148.45	152.59	161.21
Every plant orgen nitrogen content in maturity（2015—2016）
Yield	Nitrogen			Leaf			stem +Sheath			Glume + Spike			Grain			Total
	（kg/ha）			（kg/ha）			（kg/ha）			（kg/ha）			（kg/ha）			（kg/ha）
		Repeat 1	Repeat 2	average	Repeat 1	Repeat 2	average	Repeat 1	Repeat 2	average	Repeat 1	Repeat 2	average	Repeat 1	Repeat 2	average
DT	0	2.773	3.007	2.89	10.887	10.193	10.54	3.5958	3.3842	3.49	71.8278	74.0122	72.92	89.0836	90.5964	89.84
	90	3.9886	3.7114	3.85	16.0536	16.1464	16.1	6.085	7.235	6.66	71.5748	80.9452	76.26	97.702	108.038	102.87
	120	4.557	4.323	4.44	16.7498	16.1902	16.47	7.996	7.324	7.66	82.6136	80.1664	81.39	111.916	108.004	109.96
	150	5.1932	6.0868	5.64	20.9846	22.7154	21.85	8.8596	8.8804	8.87	92.933	104.827	98.88	127.97	142.51	135.24
	180	4.0952	4.8248	4.46	17.9148	19.0452	18.48	7.027	7.313	7.17	91.2238	96.3562	93.79	120.261	127.539	123.89
	210	4.145	5.095	4.62	17.7396	18.5604	18.15	7.4582	7.5218	7.49	80.8398	86.4002	83.62	110.183	117.577	113.88
NT	0	2.3026	2.9974	2.65	8.7498	8.5702	8.66	3.3994	4.5206	3.96	63.243	57.517	60.38	77.6948	73.6052	75.65
	90	3.2532	3.4068	3.33	12.0246	11.5154	11.77	5.4296	4.6304	5.03	63.284	57.896	60.59	83.9914	77.4486	80.72
	120	3.929	3.571	3.75	13.8278	13.1122	13.47	5.655	5.945	5.8	71.7846	64.2354	68.01	95.1964	86.8636	91.03
	150	4.1748	3.9852	4.08	16.7776	13.6024	15.19	4.0952	5.3848	4.74	87.9488	81.5512	84.75	112.996	104.524	108.77
	180	3.419	2.721	3.07	11.6298	10.6902	11.16	3.1054	4.2946	3.7	72.6724	61.5076	67.09	90.8266	79.2134	85.03
	210	2.6652	2.8348	2.75	10.0446	10.1954	10.12	2.9576	2.5024	2.73	62.8136	68.0664	65.44	78.481	83.599	81.04
Table Every plant orgen nitrogen content in maturity(2016—2017)
Yield	Nitrogen			Leaf			stem +Sheath			Glume + Spike			Grain			Total
	（kg/ha）			（kg/ha）			（kg/ha）			（kg/ha）			（kg/ha）			（kg/ha）
		Repeat 1	Repeat 2	average	Repeat 1	Repeat 2	average	Repeat 1	Repeat 2	average	Repeat 1	Repeat 2	average	Repeat 1	Repeat 2	average
DT	0	2.74527	2.49473	2.62	10.7781	12.8619	11.82	3.95984	4.36016	4.16	91.1095	93.9105	92.51	108.593	113.627	111.12
(421 mm)	90	3.94871	2.57129	3.26	15.8931	14.5669	15.23	6.12415	6.47585	6.3	100.859	107.681	104.27	126.825	131.295	129.06
	120	4.51143	3.96857	4.24	15.5823	15.7577	15.67	7.61604	7.42396	7.52	111.787	122.473	117.13	139.497	149.623	144.55
	150	5.14127	6.39873	5.77	21.7748	23.7652	22.77	9.7471	9.7929	9.77	132.004	129.776	130.89	168.667	169.733	169.19
	180	4.05425	4.32575	4.19	17.7357	17.7043	17.72	7.95673	8.70327	8.33	120.312	123.368	121.84	150.058	154.102	152.08
	210	4.10355	3.37645	3.74	15.5622	14.4778	15.02	7.08362	5.69638	6.39	110.031	110.189	110.11	136.781	133.739	135.26
NT	0	2.27957	1.92043	2.1	9.6623	8.7977	9.23	3.36541	3.01459	3.19	82.6106	84.2094	83.41	97.9179	97.9421	97.93
(404 mm)	90	3.22067	2.07933	2.65	11.9044	10.8356	11.37	5.1753	4.1647	4.67	92.6512	93.0488	92.85	112.951	110.129	111.54
	120	3.88971	2.55029	3.22	13.6895	12.4305	13.06	5.59845	5.78155	5.69	101.067	101.393	101.23	124.244	122.156	123.2
	150	4.13305	5.12695	4.63	16.6098	17.0902	16.85	8.05425	7.36575	7.71	117.069	113.251	115.16	145.866	142.834	144.36
	180	3.38481	2.81519	3.1	12.5135	13.2465	12.88	5.07435	6.44565	5.76	101.946	112.834	107.39	122.918	135.342	129.13
	210	2.63855	2.68145	2.66	10.9442	12.4558	11.7	3.92802	3.81198	3.87	92.1855	100.015	96.1	109.696	118.964	114.33

[truncated: 3 more sheets: yield , anova2, WUE]
